# Supplementary material for: Universal one-step graphitization of silicon-enriched biomass-derived carbon in molten salts for lithium-ion battery anodes
Source: Royal Society of Chemistry journal article supplement (doi:10.1039/d4se01602e), 2025-01-01
Supplement: d4se01602e1.pdf [file d4se01602e1.pdf]

## **Universal One-Step Graphitization of Silicon-Enriched Biomass-Derived Carbon in Molten Salts for Lithium-Ion Battery Anodes**

**Fan Wang,<sup>\*,†,R,‡,†,§</sup> Yuxin Wang,<sup>‡,†,§</sup> Ziheng Guan,<sup>†</sup> Junjie Wei,<sup>†</sup> Shengliang He,<sup>R</sup> Zhen Zhong,<sup>R</sup> Hao Chen <sup>\*,†</sup> and Peizhong Feng <sup>\*,†</sup>**

*<sup>†</sup> School of Materials Science and Physics, China University of Mining & Technology, Xuzhou, Jiangsu, 221116, China*

*<sup>R</sup> Zhejiang Jiahe Bamboo Technology Co., Ltd., Lishui Zhejiang 323000, China.*

*<sup>‡</sup> School of Biological and Chemical Engineering, Zhejiang University of Science and Technology, Hangzhou 310023, China.*

*<sup>†</sup> College of Chemistry and Materials Engineering, Zhejiang A&F University, Hangzhou 311300, China.*

*<sup>§</sup> These two authors contributed equally to this work.*

### **Corresponding Author**

**\*E-mail:** wangf@zust.edu.cn; haochen@zafu.edu.cn; pzfeng@cumt.edu.cn

**The equation for the diffusion coefficient of lithium ions is  $D_{GIT}^{1-3}$ :**

Equation (1)

$$D_{Li^+} = \frac{4}{\pi\tau} \left( \frac{m_B V_M}{M_B S} \right)^2 \left( \frac{\Delta E_s}{\tau(dE_\tau/d\sqrt{\tau})} \right)^2 \left( \tau \ll L^2/D_{Li^+} \right) \quad (1)$$

If the relation between potential and  $\tau^{1/2}$  follows a linear proportionality, equation (1) can be simplified even more to equation (2),

$$D^{GIT} = \frac{4}{\pi\tau} \left( \frac{m_B V_M}{M_B S} \right)^2 \left( \frac{\Delta E_s}{\Delta E_\tau} \right)^2 \quad (2)$$

$\tau$  represents the duration of the constant current pulse, while  $m_B$ ,  $V_M$ ,  $S$ , and  $M_B$  denote the mass, molar volume, electrode-electrolyte interface area, and molar mass of the electrode material, respectively.  $\Delta E_s$  is the voltage difference during the open circuit period, while  $\Delta E_\tau$  denotes the overall voltage change of the cell in response to a constant current pulse.

**The equation for the diffusion of lithium ions is CV method:**

$$D_{Li^+} = \frac{I_p^2 R T}{0.1992 F^3 S^2 c_0^2 v}$$

$$I_{P=} = \left( \frac{D_{Li^+} 0.1992 F^3 S^2 c_0^2}{R T} \right)^{\frac{1}{2}} v^{\frac{1}{2}}$$

$$k = \left( \frac{D_{Li^+} 0.1992 F^3 S^2 c_0^2}{R T} \right)^{\frac{1}{2}}$$

In the above equation,  $I_p$  represents the peak intensity (mA),  $R$  ( $J K^{-1} mol^{-1}$ ) is the gas constant,  $T$  (K) is the temperature,  $F$  ( $C mol^{-1}$ ) is the Faraday constant,  $S$  is the surface area of the electrode, which is  $1.13 cm^2$ ,  $C_0$  is the molar concentration of lithium ions in the material ( $mol cm^{-3}$ ),  $v$  represents the scan rate ( $mV s^{-1}$ ), and  $k$  is the slope of the fitted curve.

**The evaluation of lithium storage mechanisms** is performed by analyzing the current (i) corresponding to the oxidation/reduction peaks in the cyclic voltammetry (CV) curves along with their corresponding scan rates ( $v$ ). The equation is as follows:

$$i = av^b$$

$$\log(i) = \log(a) + b \log(v)$$

In the above equation,  $a$  and  $b$  are constants. When  $b$  approaches 1, the electrode is primarily controlled by capacitive adsorption behavior. When  $b$  approaches 0.5, the electrode is primarily controlled by ion diffusion behavior. Moreover, the capacitance contribution and diffusion contribution of the electrode can be further calculated using the equation  $i = k_1v + k_2v^{1/2}$ , where  $k_1$  and  $k_2$  are constants. The term  $k_1v$  represents the capacitance contribution of the electrode, while  $k_2v^{1/2}$  represents the diffusion contribution of the electrode.

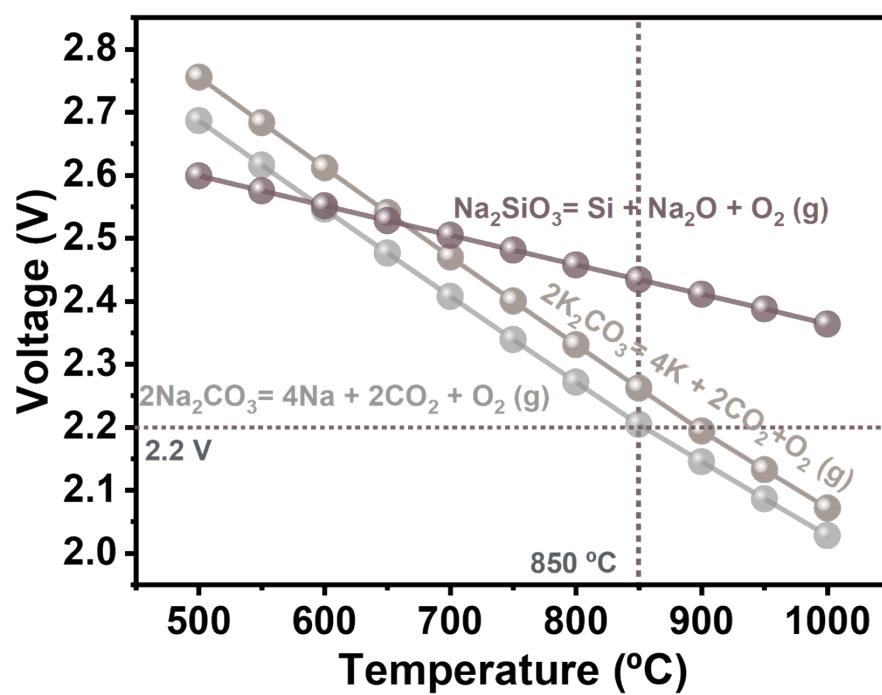

Figure S1. Profiles of the Gibbs free energy of different reactions as a function of temperature.

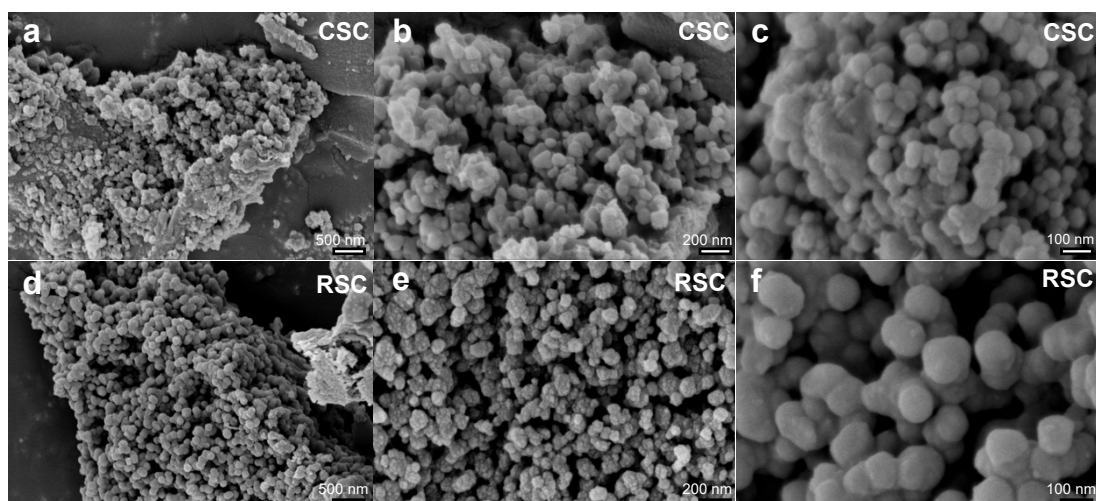

**Figure S2. SEM images of different agricultural wastes.**

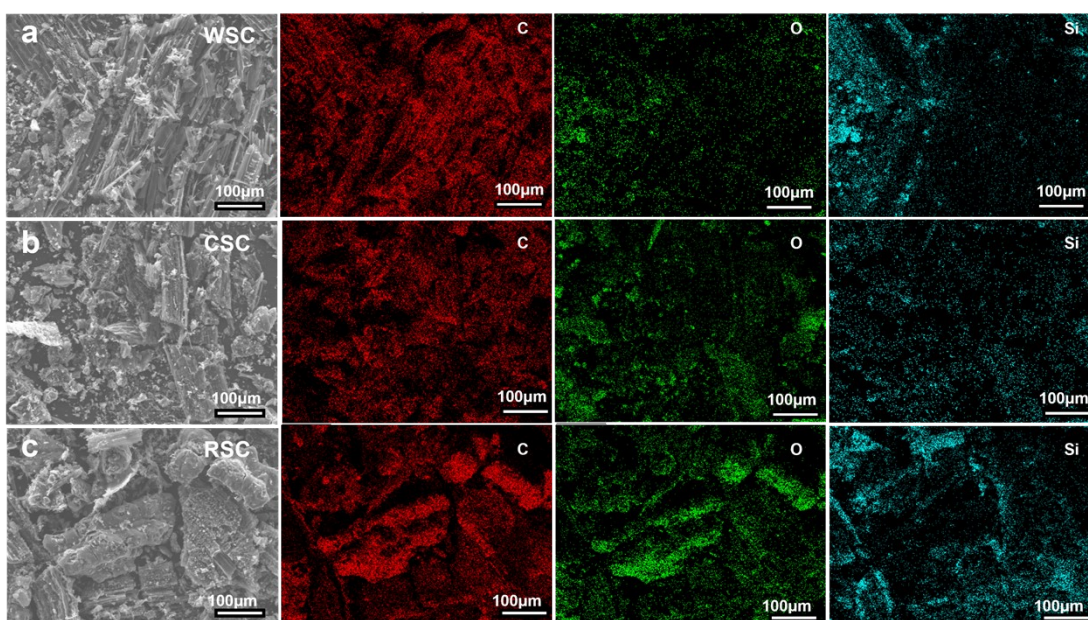

**Figure S3. SEM-EDS mapping of the (a) WSC (b) CSC (c) RSC.**

**Table S1. Quantitative EDS analysis of major elements in WSC**

| Element | Weight | Atomic |
|---------|--------|--------|
| C       | 79.06% | 84.91  |
| Si      | 5.18%  | 2.38   |
| O       | 15.77% | 12.71  |

**Table S2. Quantitative EDS analysis of major elements in CSC**

| Element | Weight | Atomic |
|---------|--------|--------|
| C       | 71.58% | 78.85  |
| Si      | 6.62%  | 3.12   |
| O       | 21.8%  | 18.03  |

**Table S3. Quantitative EDS analysis of major elements in RSC**

| Element | Weight | Atomic |
|---------|--------|--------|
| C       | 54.28% | 64.66  |
| Si      | 14.42% | 7.35   |
| O       | 31.3%  | 27.99  |

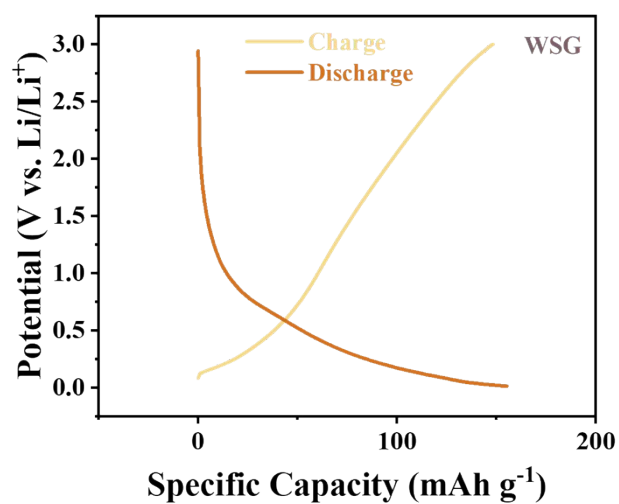

**Figure S4. Charge-discharge curves after lithium intercalation.**

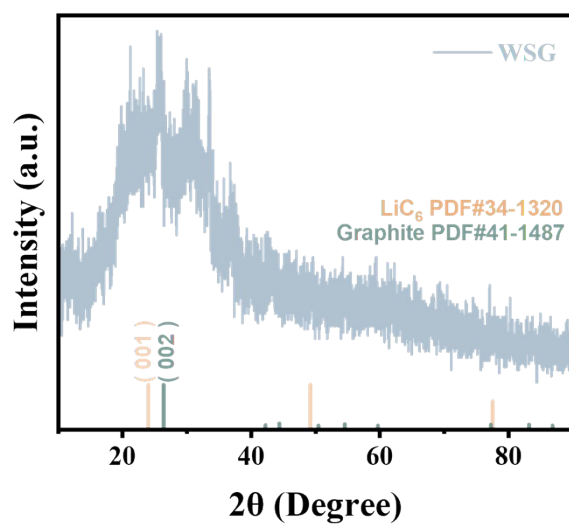

Figure S5. XRD pattern of the electrode sheet after lithium intercalation.

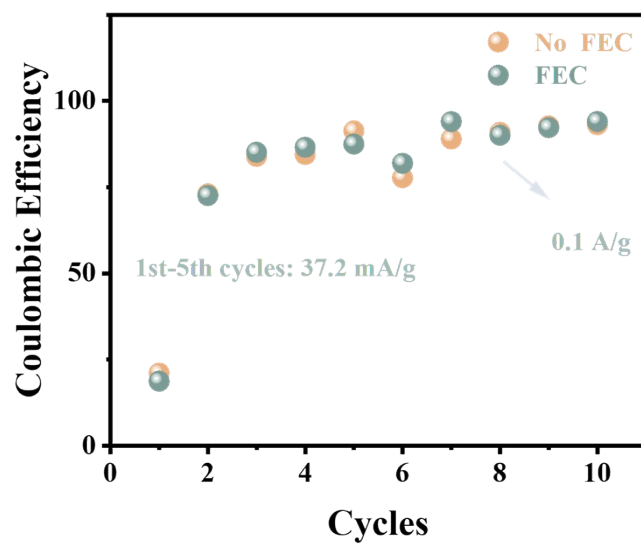

Figure S6. Coulombic efficiency of electrodes with and without FEC addition.

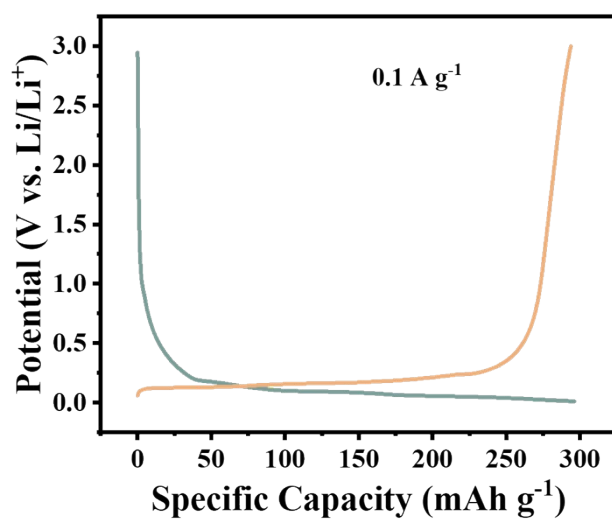

Figure S7. Charge-discharge curves of the commercial graphite electrode.

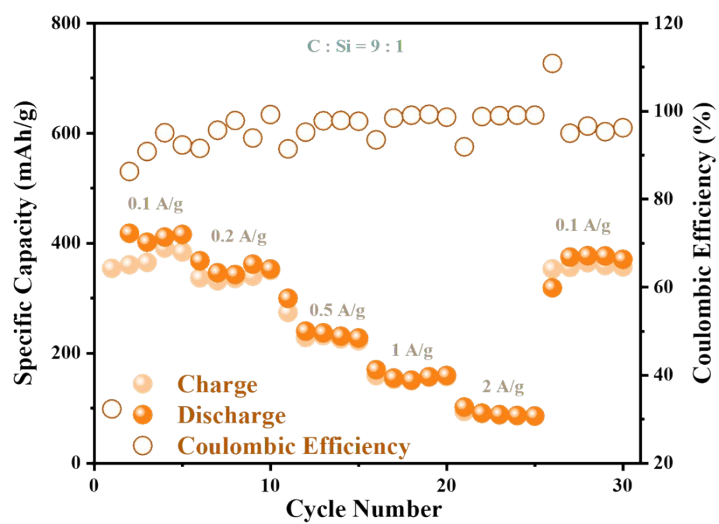

Figure S8. Rate performance of the Si/C electrodes (C: Si = 9: 1).



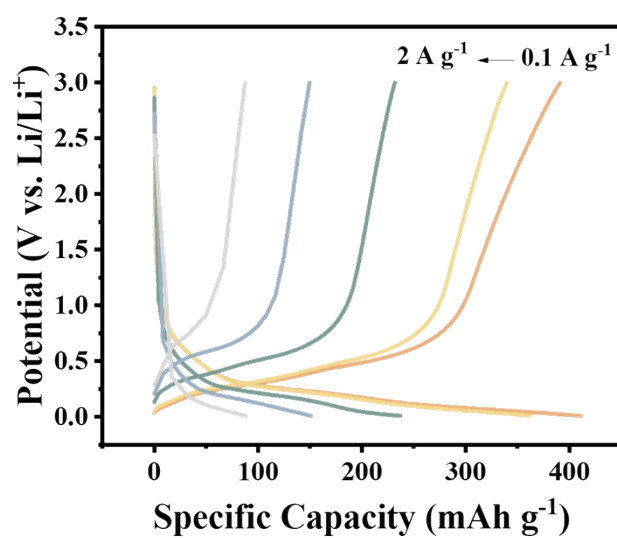

Figure S9. Charge-discharge curves of the Si/C electrodes (C: Si = 9: 1).

## References

- 1 P. Li, J.-Y. Hwang and Y.-K. Sun, *ACS Nano*, 2019, **13**, 2624–2633.
- 2 M. Han, Z. Lin, X. Ji, Y. Mu, J. Li and J. Yu, *Mater. Today Energy*, 2020, **17**, 100445.
- 3 J.-I. Lee, Y. Ko, M. Shin, H.-K. Song, N.-S. Choi, M. G. Kim and S. Park, *Energy Environ. Sci.*, 2015, **8**, 2075–2084.
